# Supplementary material
Source: ML conference proceedings conference paper supplement (https://openaccess.thecvf.com/content/ICCV_2019/html/Dong_FW-GAN_Flow-Navigated_Warping_ICCV_2019_paper.html)
Supplement: Supplementary file 1 [file Dong_FW-GAN_Flow-Navigated_Warping_ICCV_2019_supplemental.zip]

# FW-GAN: Flow-navigated Warping GAN for Video Virtual Try-on –Supplementary Material–

Haoye Dong<sup>1,\*</sup>, Xiaodan Liang<sup>1,\*</sup>, Xiaohui Shen<sup>2</sup>, Bowen Wu<sup>1</sup>, Bing-Cheng Chen<sup>1</sup>, Jian Yin<sup>1,†</sup>

<sup>1</sup>Sun Yat-sen University, <sup>2</sup>ByteDance AI Lab.

{donghy7@mail2, issjyin@mail, wubw6@mail2, chenbch9@mail2}.sysu.edu.cn  
xdliang328@gmail.com, shenxiaohui@bytedance.com

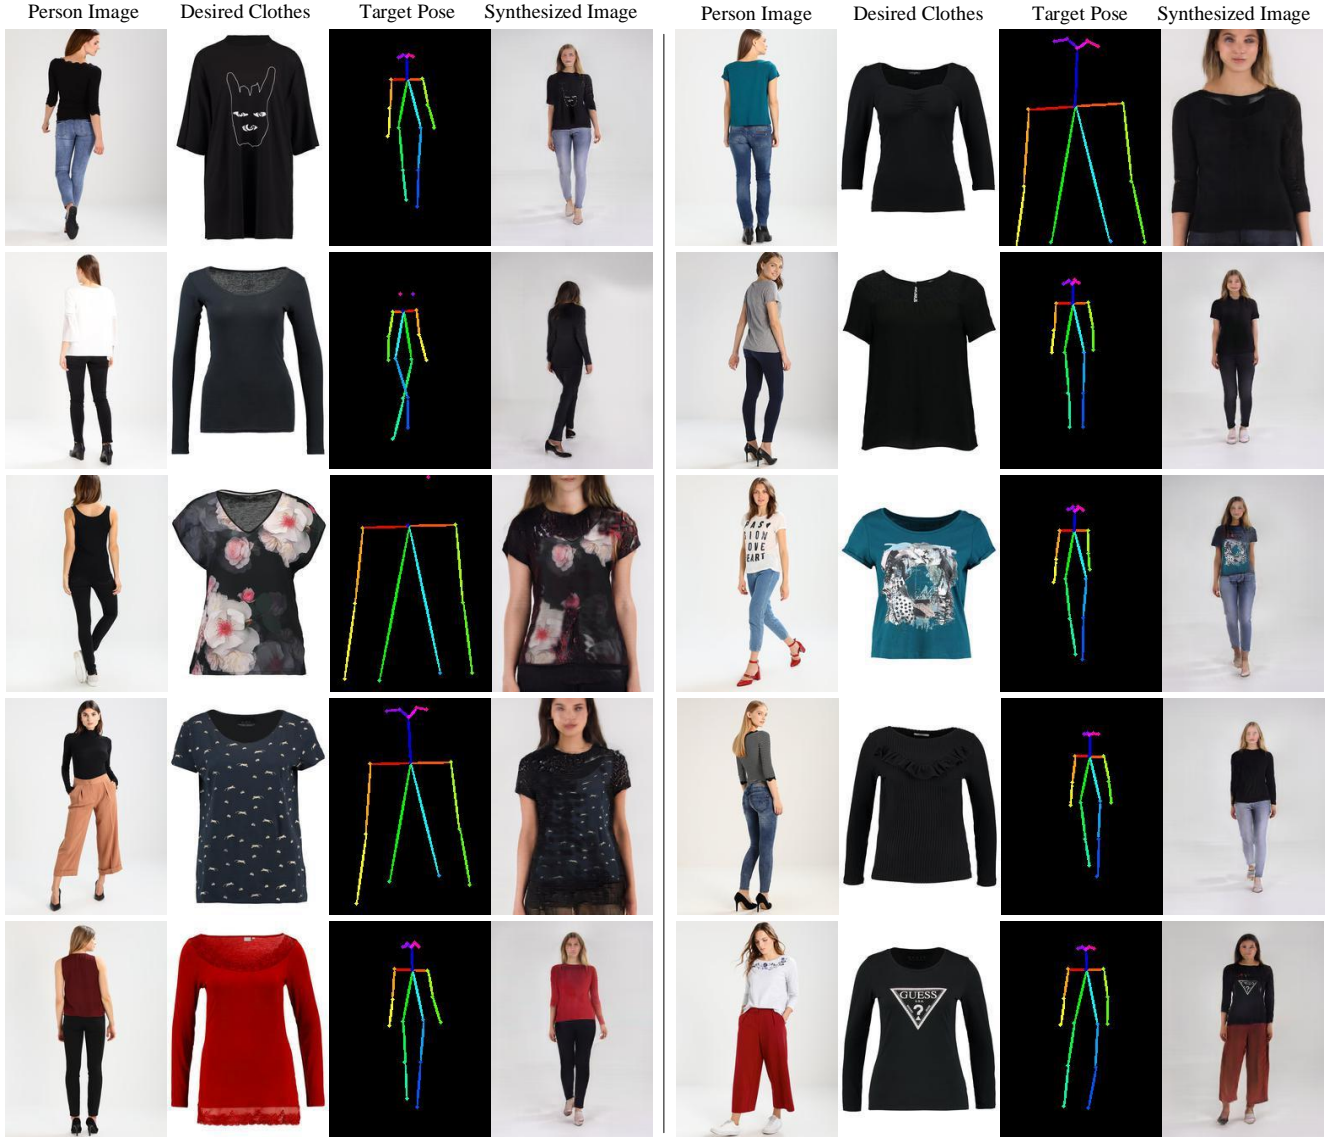

Figure 1: **Some results of the Proposed FW-GAN.** Given a person image, the desired clothes, and the target poses, our FW-GAN learns to automatically fit the desired clothes onto the person, restructure the pose of the person, and output the realistic images.

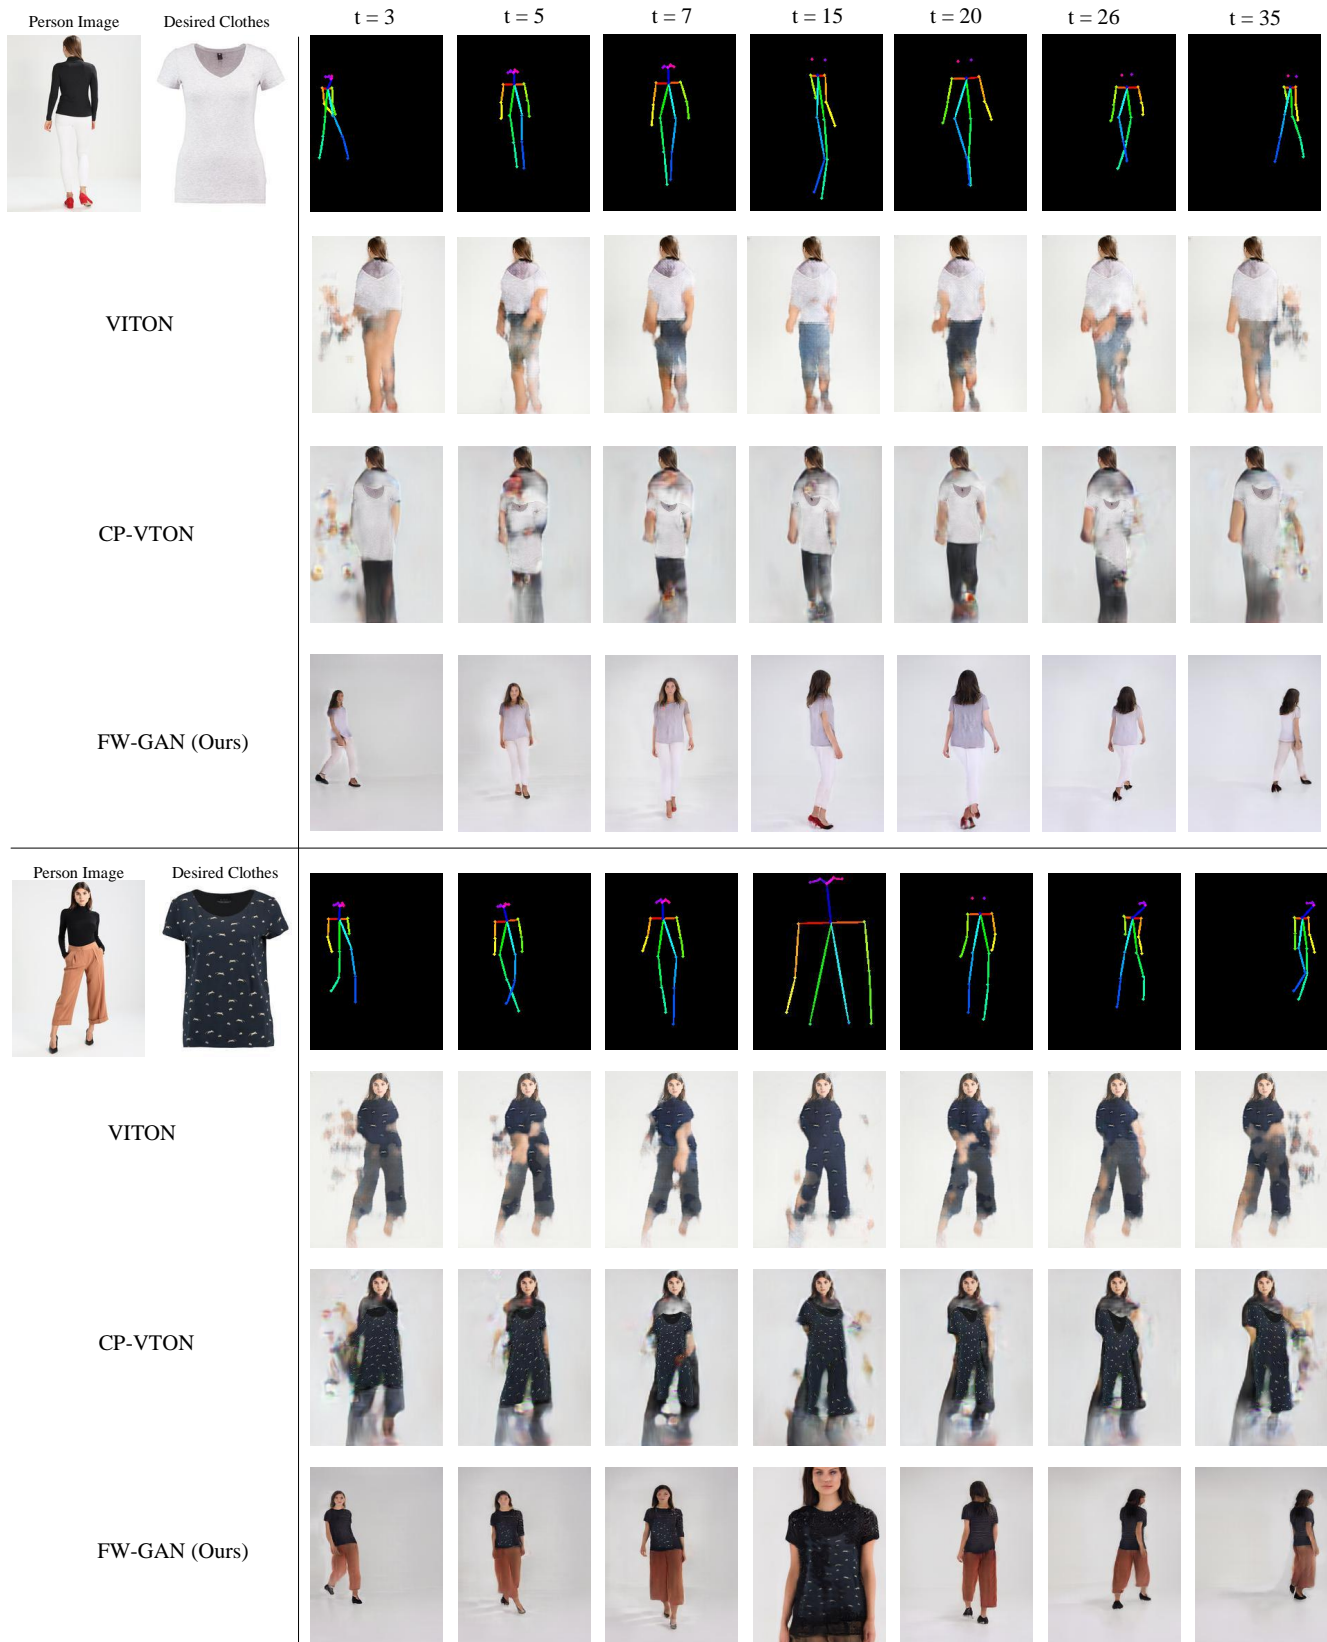

Figure 2: **Visual Comparison with VITON [1] and CP-VTON [2].** Note that more details can be observed in our supplementary videos. Please zoom in for best view.

## References

- [1] Xintong Han, Zuxuan Wu, Zhe Wu, Ruichi Yu, and Larry S Davis. Viton: An image-based virtual try-on network. In *CVPR*, 2018. 2
- [2] Bochao Wang, Huabin Zhang, Xiaodan Liang, Yimin Chen, and Liang Lin. Toward characteristic-preserving image-based virtual try-on network. In *ECCV*, 2018. 2
